# Supplementary material for: Theoretical design of the biradical character in 1,3-diphosphacyclobutanediyl and homologous structures
Source: Royal Society of Chemistry journal article supplement (doi:10.1039/c1cp23016f), 2012-01-01
Supplement: c1cp23016f.pdf [file c1cp23016f.pdf]

## Supplement

**Table S1.** Dependence of the S-T energy separations ( $-\Delta E_{S-T}$ , in kcal/mol),  $C_i$  symmetry imposed on optimized geometries.

### Basis sets

| Method          | TZVP | TZVPP | QZVP |
|-----------------|------|-------|------|
| RI-BP86-D       | 9.4  | 11.5  |      |
| RI-MP2(fc)      | 18.7 | 24.7  | 27.3 |
| RI-MP2(fc)(SCS) | 14.4 | 20.2  | 22.8 |
| RI-MP2(fc)(SOS) | 12.2 | 17.9  | 20.5 |

RI = resolution of the identity.

BP86 = Becke-Perdew density functional.

MP2(fc) = Moller-Plesset second order perturbation theory, with frozen core approximation.

SCS = spin correction according to Grimme et al..

SOS = spin correction according to Head-Gordon et al..

Basis sets:

TZVP, A. Schäfer, C. Huber, R. Ahlrichs, *J. Chem. Phys.* **100**, 5829 (1994).

TZVPP, F. Weigend, M. Häser, H. Patzelt and R. Ahlrichs, *Chem. Phys. Lett.* **294**, 143 (1998).

QZVP, F. Weigend, F. Furche and R. Ahlrichs, *J. Chem. Phys.* **119**, 12753 (2003).

**Table S2.** Dependence of the S-T energy separation ( $-\Delta E_{S-T}$ , in kcal/mol) at optimized CCSD level utilizing the TZVP basis set and partitioning of the energy components of the overall CCSD wavefunction.

| Component | $-\Delta E_{S-T}$ (in kcal/mol) |
|-----------|---------------------------------|
| HF        | -34.7                           |
| MP2       | 17.6                            |
| MP3       | 2.2                             |
| MP4D      | 4.7                             |
| MP4DQ     | 0.0                             |
| MP4SDQ    | 0.8                             |
| CCSD      | -1.2                            |
| CCSD(t)   | 5.5 (10.6) <sup>a</sup>         |

<sup>a</sup>CCSD(t)/cc-pVTZ//CCSD/TZVP; see Table 3.

For the bulky systems dispersion corrections are of considerable importance on the S-T energy separation. The matter is illustrated for the case **1** R(P) = Mes\*, R(C) = TMS.

**Table S3.** Energy difference between singlet and triplet ( $-\Delta E_{S-T}$ , in kcal/mol) at BP86/TZVP (L1) and BP86-D/TZVP (L2) level. Absolute energies are in hartree.

| State             | L1           | L2          | $\Delta E$ (L1-L2) |
|-------------------|--------------|-------------|--------------------|
| S                 | -2513.029862 | -2513.19355 | 0.16369            |
| T                 | -2512.992786 | -2513.16365 | 0.17086            |
| $-\Delta E$ (S-T) | 23.2         | 18.8        |                    |

The dispersion corrections ( $E(L1)-E(L2)$ ) are larger for the stronger pyramidalized triplet than the singlet (see last column in the table).
